# Supplementary material for: Systematic Review and Meta-Analysis: Dose-Response Relationship of Selective Serotonin Reuptake Inhibitors in Major Depressive Disorder
Source: Atypon-hosted journal article supplement (doi:10.1176/appi.ajp.2015.15030331), 2015-11-10
Supplement: appi.ajp.2015.15030331.ds001.pdf [file appi.ajp.2015.15030331.ds001.pdf]

### Supplemental Figure 2

Supplemental Figure 2 depicts the association between SSRI dose and SMD improvement in 4 dose categories of SSRIs. The 4 chosen dose categories of SSRIs: <100mg, 100-199mg, 200-250mg and >250mg were based on a meta-analysis that failed to demonstrate a dose-response relationship in antidepressant medications (not exclusively SSRIs) [interaction=0.0008 (95%CI: 0.0002-0.0014; p<0.001)]. Dosages are expressed in imipramine equivalents. 100mg of imipramine = 120mg of sertraline = 100mg of fluvoxamine = 20mg of paroxetine or fluoxetine=33.3 mg of citalopram=16.7 mg of escitalopram. Abbreviations: SMD=Standardized Mean Difference.

### Supplemental Figure 3

Supplemental Figure 3A is a scatterplot depicting the association between SSRI dosage in imipramine equivalents and difference in improvement compared to placebo (standardized mean difference). Within the scatterplot, circles represent individual studies with the size of the circle corresponding to its weight in the meta-analysis. The regression line reflects the significant positive relationship between SSRI dosage and difference of improvement compared to placebo ( $\beta=0.00029$ , 95% CI -0.00010–0.00066,  $z = 1.44$ ,  $p = 0.15$ ). Supplemental Figure 3B depicts the association between SSRI dose and difference of improvement in 4 dose categories of SSRIs ( $\chi^2=42.4$ ,  $df=3$ ,  $p<0.001$ ). The 4 chosen dose categories of SSRIs: <100mg, 100-199mg, 200-250mg and >250mg were based on a meta-analysis that failed to demonstrate a dose-response relationship in antidepressant medications (not exclusively SSRIs). Dosages are expressed in imipramine equivalents. 100mg of imipramine = 120mg of sertraline = 100mg of fluvoxamine = 20mg of paroxetine or fluoxetine=33.3 mg of citalopram=16.7 mg of escitalopram. Abbreviations: SMD=Standardized Mean Difference. Supplemental Figure 3C is a scatterplot depicting the association between SSRI dosage in imipramine equivalents and response in SSRIs compared to placebo (Odds Ratio). The regression line reflects the non-significant positive relationship between SSRI dosage and response compared to placebo ( $\beta=0.0015$ , 95% CI 0.0003–0.0026,  $z = 2.47$ ,  $p = 0.013$ ). Supplemental Figure 3D depicts the association between SSRI dose and remission in 4 dose categories of SSRIs ( $\chi^2=11.4$ ,  $df=3$ ,  $p=0.01$ ). Abbreviations: SMD=Standardized Mean Difference.

### Supplemental Figure 4

Supplemental Figure 4A is a scatterplot depicting the association between SSRI dosage in imipramine equivalents and all-cause dropouts without fluvoxamine. Within the scatterplot, circles represent individual studies with the size of the circle corresponding to its weight in the meta-analysis. The regression line reflects the significant positive relationship between SSRI dosage and all-cause dropout compared to placebo ( $\beta=-0.00092$ , 95% CI -0.00174– (-0.00010),  $z = -2.20$ ,  $p = 0.03$ ). Supplemental Figure 4B depicts the association between SSRI dose and dropout due to side-effects in 4 dose categories of SSRIs without fluvoxamine ( $\beta=0.00249$  95% CI 0.00073– 0.00425,  $z = 2.77$ ,  $p = 0.006$ ). The 4 chosen dose categories of SSRIs: <100mg, 100-199mg, 200-250mg and >250mg were based on a meta-analysis that failed to demonstrate a dose-response relationship in antidepressant medications (not exclusively SSRIs). Dosages are expressed in imipramine equivalents. 100mg of imipramine = 120mg of sertraline = 100mg of fluvoxamine = 20mg of paroxetine or fluoxetine=33.3 mg of citalopram=16.7 mg of escitalopram. Supplemental Figure 4C depicts the association between SSRI dose and dropout in 4 dose categories of SSRIs without fluvoxamine ( $\chi^2=3.7$ ,  $df=3$ ,  $p=0.29$ ).

## Supplemental Figure 1

| Actual OR of Treatment Response           |                            |                      | Estimated OR based on Effect Size   |                            |                      |
|-------------------------------------------|----------------------------|----------------------|-------------------------------------|----------------------------|----------------------|
| <i>Placebo</i>                            | <i>Subtherapeutic SSRI</i> | <i>Low-dose SSRI</i> | <i>Placebo</i>                      | <i>Subtherapeutic SSRI</i> | <i>Low-dose SSRI</i> |
| 1.81 (1.48-2.21)                          |                            |                      | 2.41 (2.01-2.90)                    |                            |                      |
| 1.94 (1.58-2.37)                          | 1.07 (0.87-1.31)           |                      | 3.25 (2.78-3.79)                    | 1.35 (1.15-1.57)           |                      |
| 2.72 (2.08-3.54)                          | 1.50 (1.15-1.96)           | 1.40 (1.07-1.82)     | 5.07 (4.34-5.91)                    | 2.10 (1.80-2.45)           | 1.56 (1.34-1.82)     |
| 2.64 (2.20-3.18)                          | 1.46 (1.22-1.76)           | 1.36 (1.13-1.64)     | 2.99 (2.58-3.46)                    | 1.24 (1.07-1.44)           | 0.92 (0.79-1.06)     |
| Actual NNT of Treatment Response*         |                            |                      | Estimated NNT based on Effect Size* |                            |                      |
| <i>Placebo</i>                            | <i>Subtherapeutic SSRI</i> | <i>Low-dose SSRI</i> | <i>Placebo</i>                      | <i>Subtherapeutic SSRI</i> | <i>Low-dose SSRI</i> |
| 7 (5-11)                                  |                            |                      | 5 (4-6)                             |                            |                      |
| 6 (5-9)                                   | 64 (16-∞)                  |                      | 3 (3-4)                             | 14 (9-30)                  |                      |
| 4 (3-6)                                   | 10 (6-30)                  | 12 (7-64)            | 3 (2-3)                             | 6 (5-7)                    | 9 (7-14)             |
| 4 (4-5)                                   | 11 (7-21)                  | 14 (8-35)            | 4 (3-4)                             | 20 (11-64)                 | No Benefit*          |
| Actual OR of Dropout Due to Side-Effects  |                            |                      | Actual OR of All Cause Dropout      |                            |                      |
| <i>Placebo</i>                            | <i>Subtherapeutic SSRI</i> | <i>Low-dose SSRI</i> | <i>Placebo</i>                      | <i>Subtherapeutic SSRI</i> | <i>Low-dose SSRI</i> |
| 1.58 (0.92-2.72)                          |                            |                      | 0.77 (0.59-0.99)                    |                            |                      |
| 1.69 (1.13-2.51)                          | 1.07 (0.72-1.59)           |                      | 1.06 (0.86-1.30)                    | 1.38 (1.12-1.69)           |                      |
| 3.16 (2.32-4.32)                          | 2.00 (1.47-2.73)           | 1.87 (1.37-2.56)     | 0.80 (0.68-0.95)                    | 1.03 (0.88-1.23)           | 0.75 (0.64-0.90)     |
| 3.06 (2.25-4.17)                          | 1.94 (1.42-2.64)           | 1.81 (1.33-2.47)     | 0.72 (0.62-0.84)                    | 0.94 (0.81-1.09)           | 0.68 (0.58-0.79)     |
| Actual NNH of Dropout Due to Side-Effects |                            |                      |                                     |                            |                      |
| <i>Placebo</i>                            | <i>Subtherapeutic SSRI</i> | <i>Low-dose SSRI</i> |                                     |                            |                      |
| 33 (12-∞)                                 |                            |                      |                                     |                            |                      |
| 28 (13-142)                               | 263 (32-∞)                 |                      |                                     |                            |                      |
| 10 (7-15)                                 | 19 (12-40)                 | 24 (14-57)           |                                     |                            |                      |
| 10 (7-16)                                 | 21 (12-45)                 | 22 (13-51)           |                                     |                            |                      |

Supplemental Figure 1 depicts the actual and estimated OR, NNT, and NNH for treatment response, effect size, and dropout for all trials. Abbreviations: OR = Odds Ratio, NNT = Number Needed to Treat, NNH = Number Needed to Harm

## Supplemental Figure 1

| <b>Actual OR of Treatment Response</b>           |                            |                      | <b>Estimated OR based on Effect Size</b>   |                            |                      |
|--------------------------------------------------|----------------------------|----------------------|--------------------------------------------|----------------------------|----------------------|
| <i>Placebo</i>                                   | <i>Subtherapeutic SSRI</i> | <i>Low-dose SSRI</i> | <i>Placebo</i>                             | <i>Subtherapeutic SSRI</i> | <i>Low-dose SSRI</i> |
| 1.81 (1.48-2.21)                                 |                            |                      | 2.41 (2.01-2.90)                           |                            |                      |
| 1.94 (1.58-2.37)                                 | 1.07 (0.87-1.31)           |                      | 3.25 (2.78-3.79)                           | 1.35 (1.15-1.57)           |                      |
| 2.72 (2.08-3.54)                                 | 1.50 (1.15-1.96)           | 1.40 (1.07-1.82)     | 5.07 (4.34-5.91)                           | 2.10 (1.80-2.45)           | 1.56 (1.34-1.82)     |
| 2.64 (2.20-3.18)                                 | 1.46 (1.22-1.76)           | 1.36 (1.13-1.64)     | 2.99 (2.58-3.46)                           | 1.24 (1.07-1.44)           | 0.92 (0.79-1.06)     |
| <b>Actual NNT of Treatment Response*</b>         |                            |                      | <b>Estimated NNT based on Effect Size*</b> |                            |                      |
| <i>Placebo</i>                                   | <i>Subtherapeutic SSRI</i> | <i>Low-dose SSRI</i> | <i>Placebo</i>                             | <i>Subtherapeutic SSRI</i> | <i>Low-dose SSRI</i> |
| 7 (5-11)                                         |                            |                      | 5 (4-6)                                    |                            |                      |
| 6 (5-9)                                          | 64 (16-∞)                  |                      | 3 (3-4)                                    | 14 (9-30)                  |                      |
| 4 (3-6)                                          | 10 (6-30)                  | 12 (7-64)            | 3 (2-3)                                    | 6 (5-7)                    | 9 (7-14)             |
| 4 (4-5)                                          | 11 (7-21)                  | 14 (8-35)            | 4 (3-4)                                    | 20 (11-64)                 | No Benefit*          |
| <b>Actual OR of Dropout Due to Side-Effects</b>  |                            |                      | <b>Actual OR of All Cause Dropout</b>      |                            |                      |
| <i>Placebo</i>                                   | <i>Subtherapeutic SSRI</i> | <i>Low-dose SSRI</i> | <i>Placebo</i>                             | <i>Subtherapeutic SSRI</i> | <i>Low-dose SSRI</i> |
| 1.58 (0.92-2.72)                                 |                            |                      | 0.77 (0.59-0.99)                           |                            |                      |
| 1.69 (1.13-2.51)                                 | 1.07 (0.72-1.59)           |                      | 1.06 (0.86-1.30)                           | 1.38 (1.12-1.69)           |                      |
| 3.16 (2.32-4.32)                                 | 2.00 (1.47-2.73)           | 1.87 (1.37-2.56)     | 0.80 (0.68-0.95)                           | 1.03 (0.88-1.23)           | 0.75 (0.64-0.90)     |
| 3.06 (2.25-4.17)                                 | 1.94 (1.42-2.64)           | 1.81 (1.33-2.47)     | 0.72 (0.62-0.84)                           | 0.94 (0.81-1.09)           | 0.68 (0.58-0.79)     |
| <b>Actual NNH of Dropout Due to Side-Effects</b> |                            |                      |                                            |                            |                      |
| <i>Placebo</i>                                   | <i>Subtherapeutic SSRI</i> | <i>Low-dose SSRI</i> |                                            |                            |                      |
| 33 (12-∞)                                        |                            |                      |                                            |                            |                      |
| 28 (13-142)                                      | 263 (32-∞)                 |                      |                                            |                            |                      |
| 10 (7-15)                                        | 19 (12-40)                 | 24 (14-57)           |                                            |                            |                      |
| 10 (7-16)                                        | 21 (12-45)                 | 22 (13-51)           |                                            |                            |                      |

Supplemental Figure 1 depicts the actual and estimated OR, NNT, and NNH for treatment response, effect size, and dropout for all trials. Abbreviations: OR = Odds Ratio, NNT = Number Needed to Treat, NNH = Number Needed to Harm

# Supplemental Figure 2

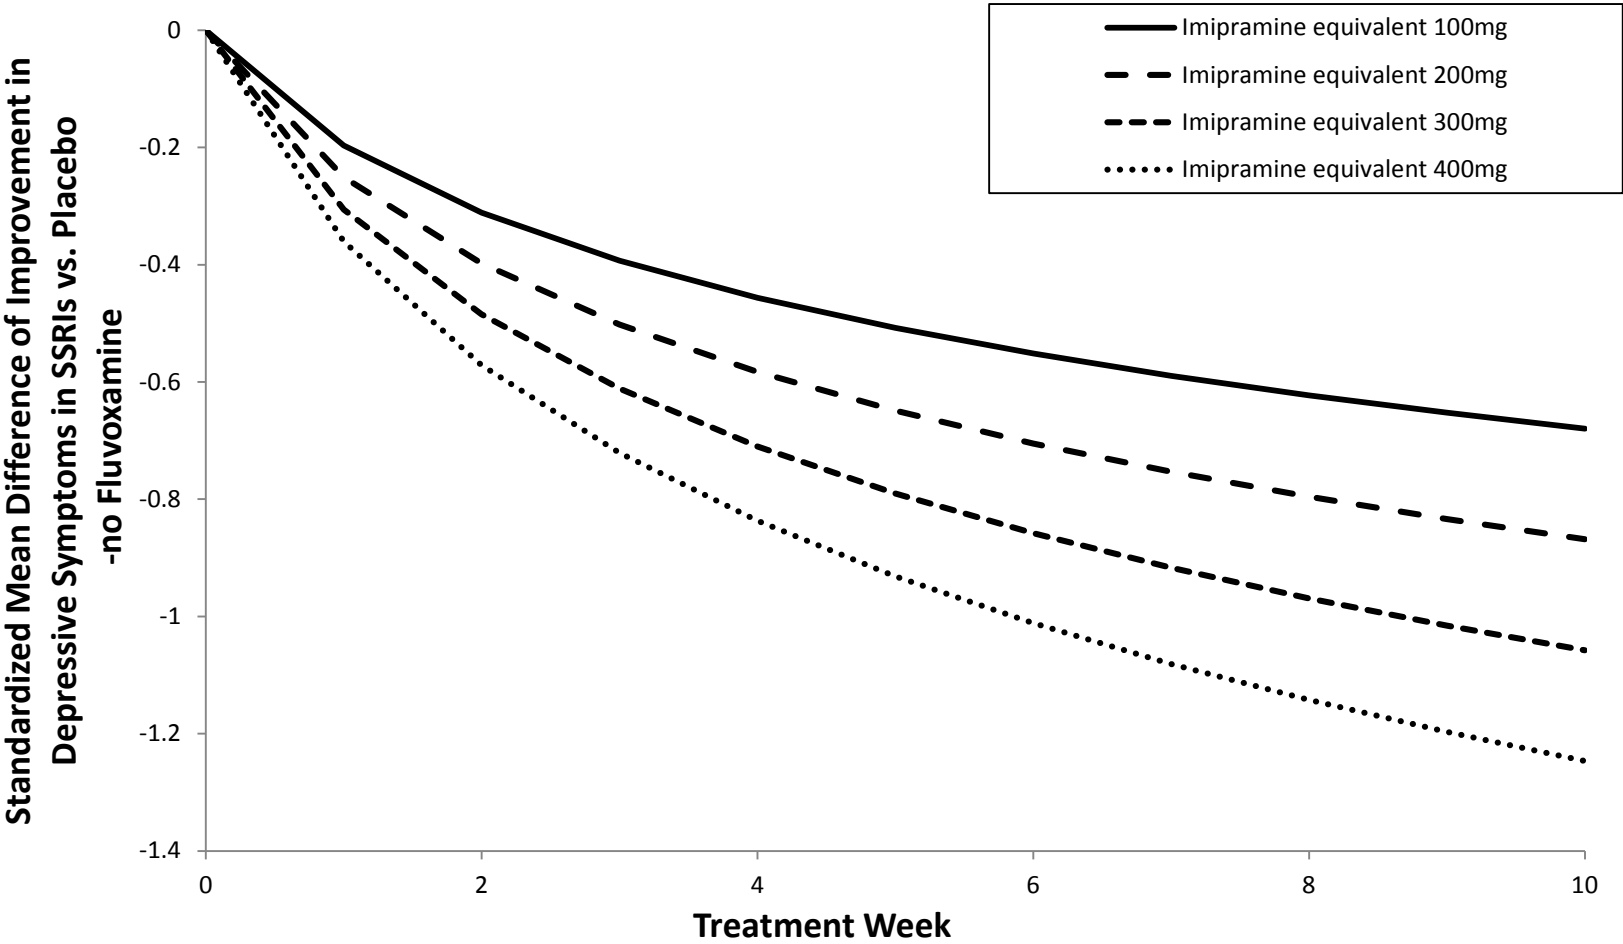

# Supplemental Figure 3

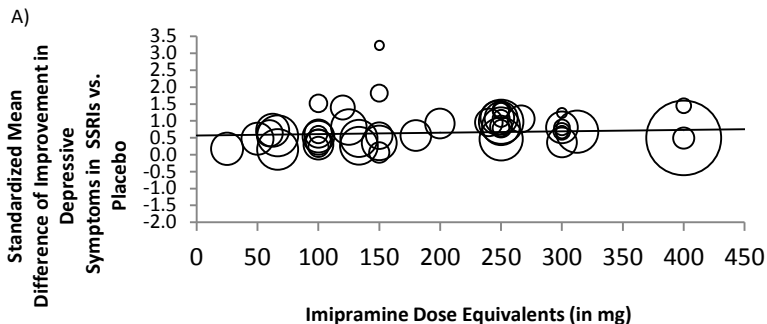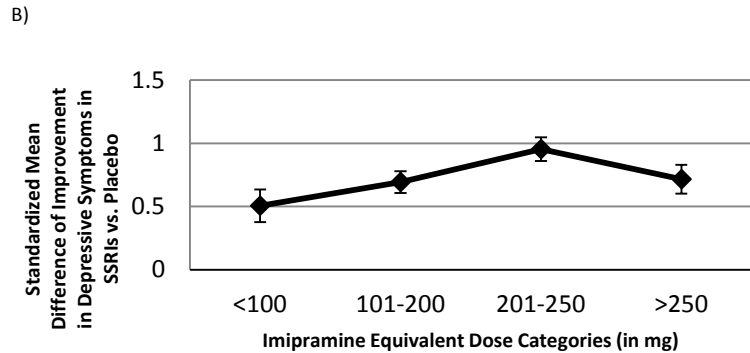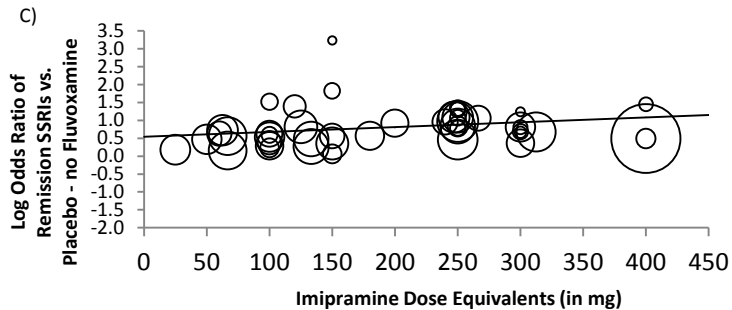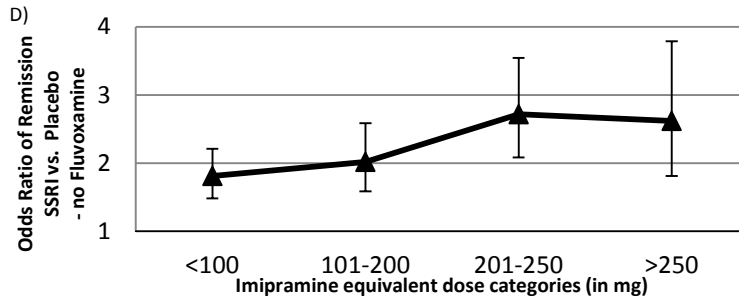

# Supplemental Figure 4

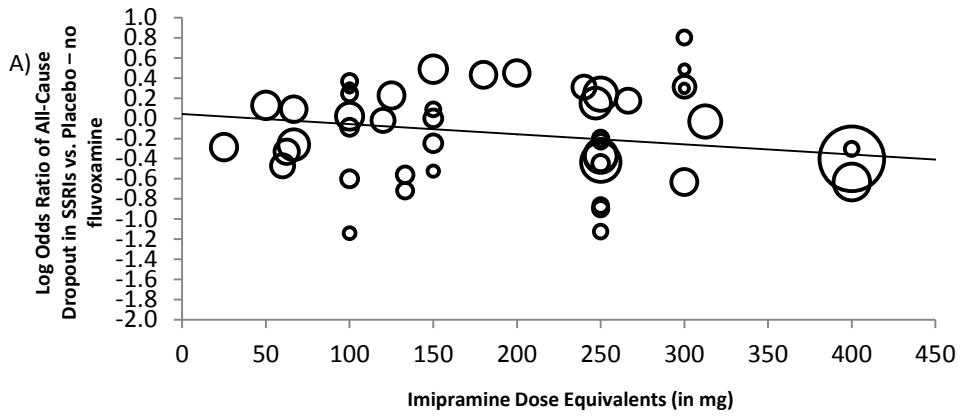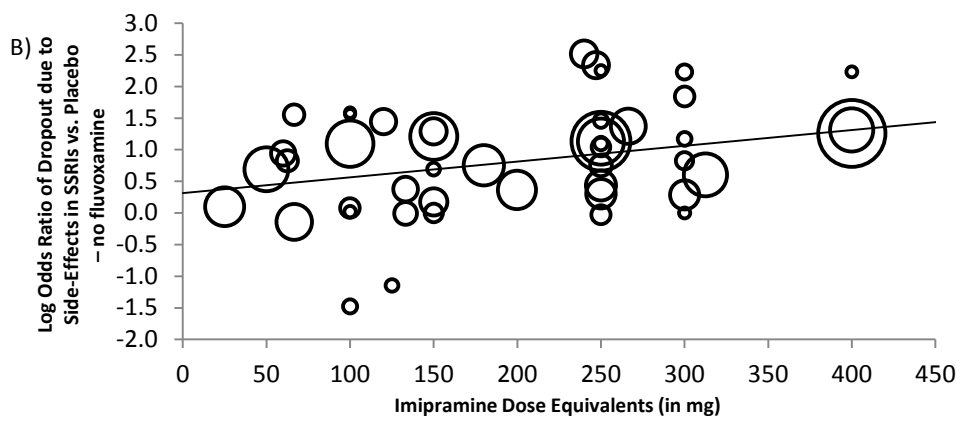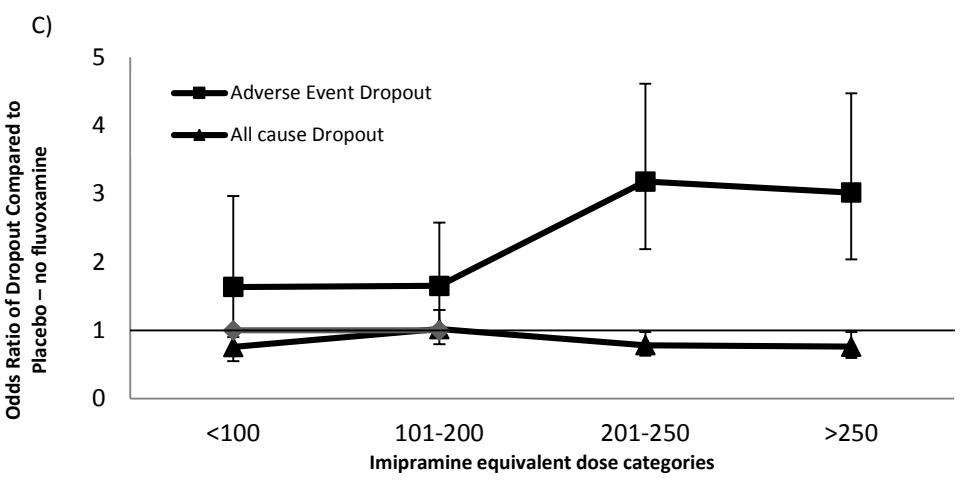

**Supplementary Table 1: Characteristics of Included Studies**

| Author        | Year | Number of active treatment arms | SSRI              | Dose (mg)        | Imipramine Dose Equivalents (mg) | Duration of Trial (weeks) | Depression Scale | N <sup>a</sup> | Completer vs ITT |
|---------------|------|---------------------------------|-------------------|------------------|----------------------------------|---------------------------|------------------|----------------|------------------|
| Byerley       | 1988 | 1                               | Fluoxetine        | 80               | 400                              | 6                         | HAM-D            | 61             | Completer        |
| Claghorn      | 1996 | 1                               | Fluvoxamine       | 150              | 150                              | 6                         | HAM-D21          | 89             | ITT              |
| Claghorn      | 1992 | 1                               | Paroxetine        | 50               | 250                              | 6                         | HAM-D            | 337            | ITT              |
| Cohn          | 1992 | 1                               | Paroxetine        | 50               | 250                              | 6                         | HAM-D            | 71             | ITT              |
| Corrigan      | 2000 | 1                               | Fluoxetine        | 20               | 100                              | 8                         | HAM-D            | 70             | ITT              |
| DeRubeis      | 2005 | 1                               | Paroxetine        | 50               | 150                              | 8                         | HAM-D            | 180            | ITT              |
| Detke         | 2004 | 1                               | Paroxetine        | 20               | 100                              | 8                         | HAM-D17          | 179            | ITT              |
| Dominguez     | 1985 | 1                               | Fluvoxamine       | 300              | 300                              | 4                         | HAMD17           | 64             | Completer        |
| Dunbar        | 1993 | 1                               | Paroxetine        | 50               | 250                              | 6                         | HAM-D            | 273            | ITT              |
| Edwards       | 1993 | 1                               | Paroxetine        | 30               | 150                              | 6                         | HAM-D            | 41             | ITT              |
| Fabre         | 1996 | 1                               | Fluvoxamine       | 150              | 150                              | 6                         | HAM-D21          |                | ITT              |
| Fabre         | 1992 | 1                               | Paroxetine        | 50               | 250                              | 6                         | HAM-D            | 74             | ITT              |
| Fabre         | 1995 | 3                               | Sertraline        | 50, 100, 200     | 60, 120, 240                     | 6                         | HAM-D            | 369            | Completer        |
| Fava          | 2005 | 1                               | Fluoxetine        | 20               | 100                              | 6                         | HAM-D17          | 90             | ITT              |
| Feighner      | 1993 | 1                               | Paroxetine        | 50               | 250                              | 6                         | HAM-D            | 480            | ITT              |
| Feighner      | 1989 | 1                               | Fluoxetine        | 80               | 400                              | 6                         | HAM-D21          | 99             | Completer        |
| Feighner      | 1999 | 1                               | Citalopram        | n/a <sup>b</sup> | n/a <sup>b</sup>                 | 6                         | HAM-D            | 650            | ITT              |
| Feighner      | 1992 | 1                               | Paroxetine        | 50               | 250                              | 6                         | HAM-D            | 76             | ITT              |
| Golden        | 2002 | 2                               | Paroxetine IR, XR | 50, 62.5         | 250, 312.5                       | 12                        | HAM-D            | 827            | ITT              |
| Heiligenstein | 1993 | 1                               | Fluoxetine        | 20               | 100                              | 8                         | MADRS            | 89             | ITT              |

|                    |      |   |                            |                    |                   |    |         |      |           |
|--------------------|------|---|----------------------------|--------------------|-------------------|----|---------|------|-----------|
| <b>Kiev</b>        | 1999 | 1 | Paroxetine                 | 50                 | 250               | 6  | HAM-D   | 66   | Completer |
| <b>Lepola</b>      | 2003 | 2 | Escitalopram<br>Citalopram | 20,40              | 133.2,<br>199.8   | 8  | MADRS   | 623  | ITT       |
| <b>Lydiard</b>     | 1989 | 1 | Fluvoxamine                | 300                | 300               | 6  | HAM-D   | 36   | Completer |
| <b>March</b>       | 1990 | 1 | Fluvoxamine                | 300                | 300               | 7  | HAM-D   | 25   | Completer |
| <b>Mendels</b>     | 1999 | 1 | Citalopram                 | 80                 | 266.4             | 4  | HAM-D   | 180  | ITT       |
| <b>Nierenberg</b>  | 2007 | 1 | Escitalopram               | 10                 | 66.6              | 8  | HAM-D17 | 411  | ITT       |
| <b>Porro</b>       | 1988 | 1 | Fluvoxamine                | 150                | 150               | 4  | HAM-D   | 41   | Completer |
| <b>Reimherr</b>    | 1990 | 1 | Sertraline                 | n/a <sup>b</sup>   | n/a <sup>b</sup>  | 8  | HAM-D   | 283  | ITT       |
| <b>Rickels</b>     | 1989 | 1 | Paroxetine                 | 50                 | 250               | 6  | HAM-D   | 111  | ITT       |
| <b>Roth</b>        | 1990 | 1 | Fluvoxamine                | 300                | 300               | 6  | HAM-D   | 56   | Completer |
| <b>Rudolph</b>     | 1999 | 1 | Fluoxetine                 | 60                 | 300               | 8  | MADRS   | 200  | ITT       |
| <b>Silverstone</b> | 1999 | 1 | Fluoxetine                 | 60                 | 300               | 12 | HAM-D   | 237  | ITT       |
| <b>Smith</b>       | 1992 | 1 | Paroxetine                 | 50                 | 250               | 6  | HAM-D   | 66   | ITT       |
| <b>Sramek</b>      | 1995 | 1 | Fluoxetine                 | 20                 | 100               | 9  | HAM-D   | 142  | ITT       |
| <b>Stahl</b>       | 2000 | 2 | Citalopram,<br>Sertraline  | 50, 150            | 133.2, 180        | 24 | HAM-D   | 423  | ITT       |
| <b>Tollefson</b>   | 1994 | 1 | Fluoxetine                 | 80                 | 400               | 6  | HAM-D21 | 1398 | ITT       |
| <b>Trivedi</b>     | 2004 | 2 | Paroxetine                 | 12.5, 25           | 62.5, 125         | 8  | HAM-D   | 447  | ITT       |
| <b>Wade</b>        | 2002 | 1 | Escitalopram               | 10                 | 66.6              | 8  | MADRS   | 380  | ITT       |
| <b>Walczak</b>     | 1996 | 4 | Fluvoxamine                | 25, 50,100,<br>150 | 25,<br>50,100,150 | 6  | HAM-D13 | 599  | ITT       |
| <b>Perahia</b>     | 2006 | 1 | Paroxetine                 | 20                 | 100               | 8  | HAM-D   | 196  | ITT       |

Supplementary Table 1: Overview of The Characteristics of Included Studies. Abbreviations: ITT=Intent-to-treat, SSRI=Selective-Serotonin Reuptake Inhibitor, HAM-D=Hamilton Depression Rating Scale, MADRS = Montgomery-Asberg Depression Rating Scale
